# Supplementary material
Source: publisher figshare collection journal article supplement (https://acs.figshare.com/ndownloader/files/11034938)
Supplement: Supplementary file 1 [file 11034938]

## Supporting Information

### High-Quality Single-Crystalline MFI-Type Nanozeolites: A Facile Synthetic Strategy and MTP Catalytic Studies

Qiang Zhang,<sup>†</sup> Guangrui Chen,<sup>†</sup> Yuyao Wang,<sup>†</sup> Mengyang Chen,<sup>†</sup> Guanqi Guo,<sup>†</sup> Jing Shi,<sup>§</sup> Jun Luo,<sup>§</sup> Jihong Yu<sup>\*,†,‡</sup>

<sup>†</sup>State Key Laboratory of Inorganic Synthesis and Preparative Chemistry, College of Chemistry, Jilin University, 2699 Qianjin Street, Changchun 130012, P. R. China

<sup>‡</sup>International Center of Future Science, Jilin University, 2699 Qianjin Street, Changchun 130012, P. R. China

<sup>§</sup>Center for Electron Microscopy, Tianjin Key Laboratory of Advanced Functional Porous Materials, Institute for New Energy Materials & Low-Carbon Technologies, School of Materials, Tianjin University of Technology, Tianjin 300384, P. R. China

Author to whom correspondence should be addressed.

E-mail: [jihong@jlu.edu.cn](mailto:jihong@jlu.edu.cn).

## Contents

Figure S1. Size distributions of silicalite-1 samples synthesized under varied conditions.

Figure S2. DLS curves of silicalite-1 samples synthesized under varied conditions.

Figure S3. XRD patterns of silicalite-1 samples synthesized under varied conditions.

Figure S4. TEM and HRTEM images of (a-d) S-LC-8o, (e-h) S-L<sub>o</sub>C<sub>o</sub>-8o.

Figure S5. FTIR spectra of L-lysine, dried initial synthesis gel, and dried silicalite-1 samples without washing.

Figure S6. TG curves of silicalite-1 samples and L-lysine.

Figure S7. N<sub>2</sub> adsorption/desorption of selected silicalite-1 samples.

Figure S8. (a) XRD patterns of S-LC-8o crystallized at 170°C for different time and (b) a schematic identifying the crystal faces and directions.

Figure S9. TEM images of (a), (b) CZ-1 and (c), (d) CZ-2.

Figure S10. XRD patterns of nanosized ZSM-5 catalysts NZ-1 and NZ-2, and conventional ZSM-5 catalysts CZ-1 and CZ-2.

Figure S11. N<sub>2</sub> adsorption/desorption of selected ZSM-5 samples.

Figure S12. NH<sub>3</sub>-TPD profiles of nanosized ZSM-5 catalysts NZ-1, NZ-2 and conventional ZSM-5 catalysts CZ-1, CZ-2.

Figure S13. Product selectivity of methanol as a function of time on stream over (a) CZ-1, (b) CZ-2, (c) NZ-1, and (d) NZ-2. Reaction conditions: T = 470°C, P<sub>total</sub> = 1 atm. WHSV = 7.2 h<sup>-1</sup>, catalyst weight = 150 mg.

Table S1. Molar compositions of the initial mixtures, reaction conditions, and particle sizes of nanosized and conventional ZSM-5 catalysts.

Table S2. C, H, N analysis of selected samples.

Table S3. Crystal sizes estimated from Scherrer equation to selected (hkl) planes of S-LC-8o crystallized at 170°C for different time.

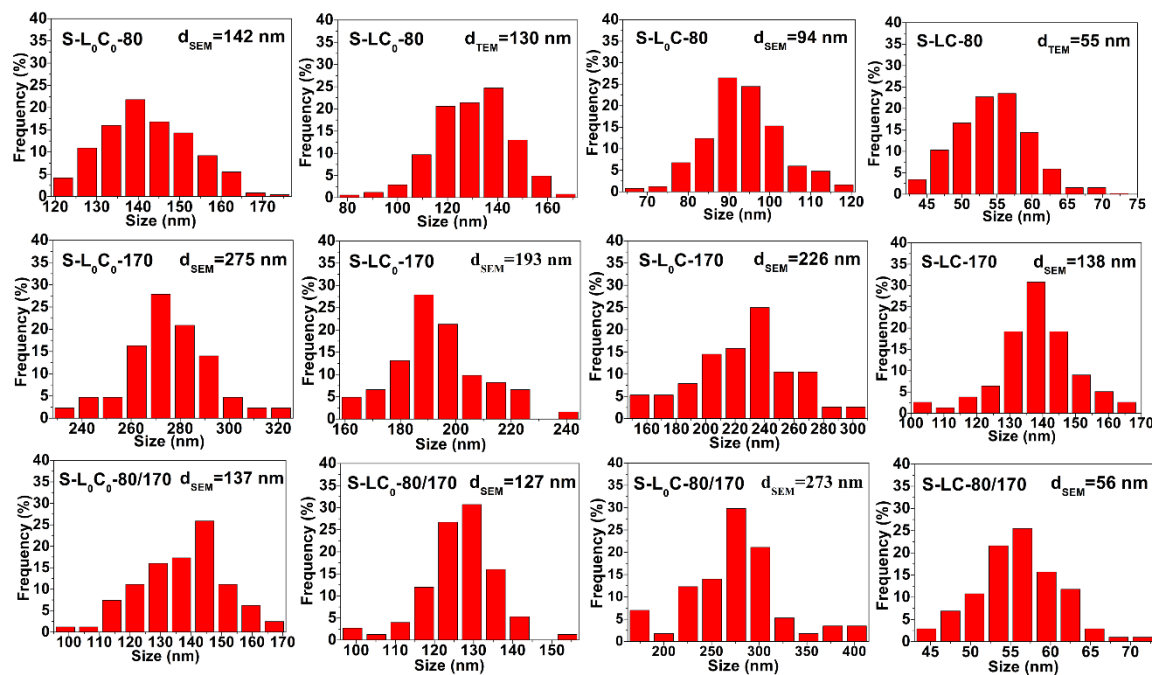

**Figure S1.** Size distributions of silicalite-1 samples synthesized under varied conditions.

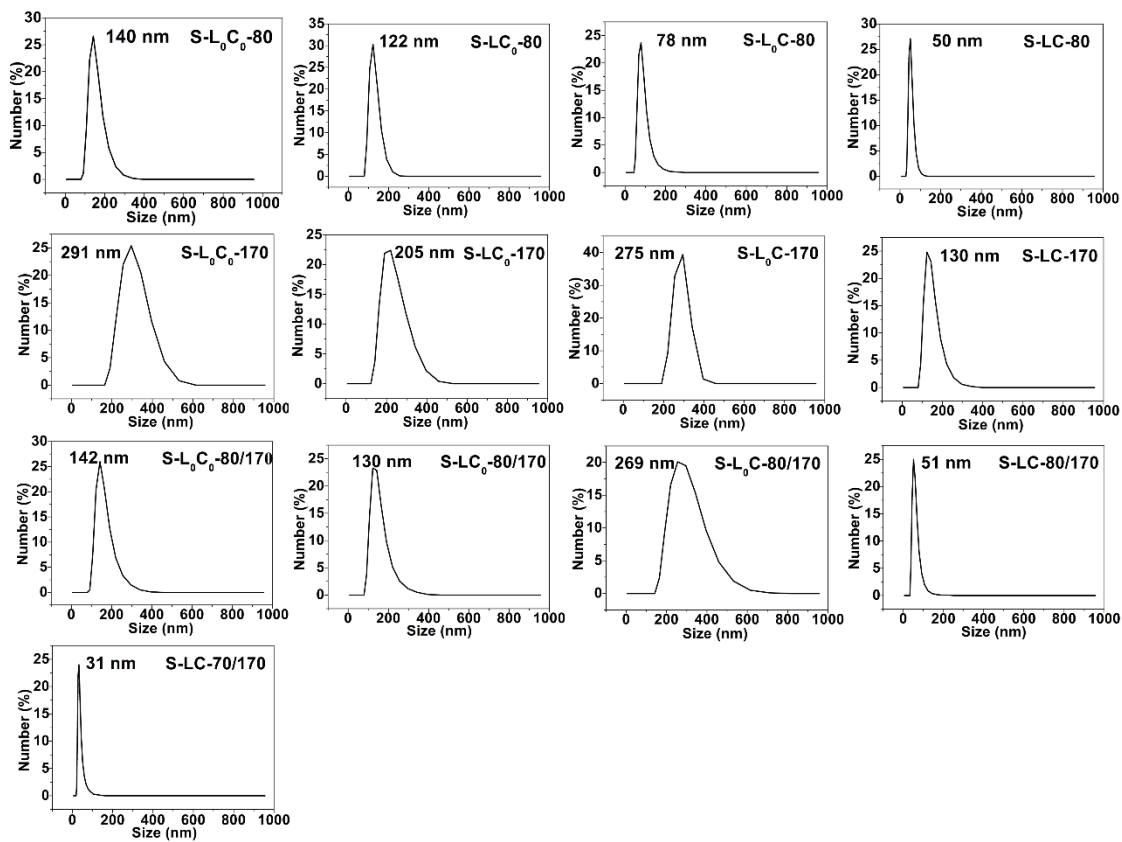

**Figure S2.** DLS curves of silicalite-1 samples synthesized under varied conditions.

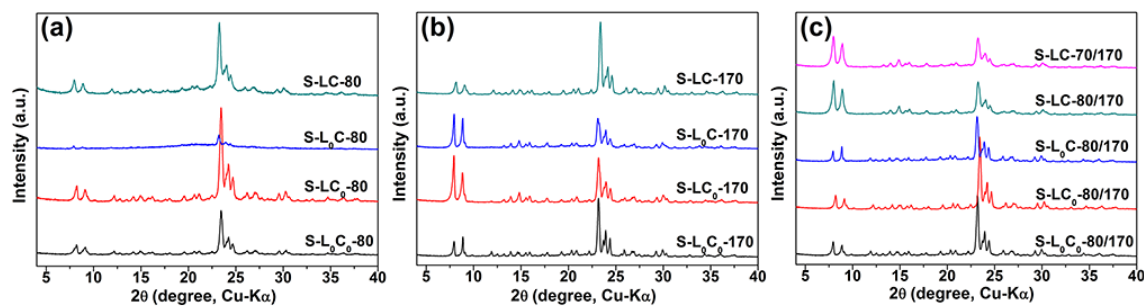

**Figure S3.** XRD patterns of silicalite-1 samples synthesized under varied conditions.

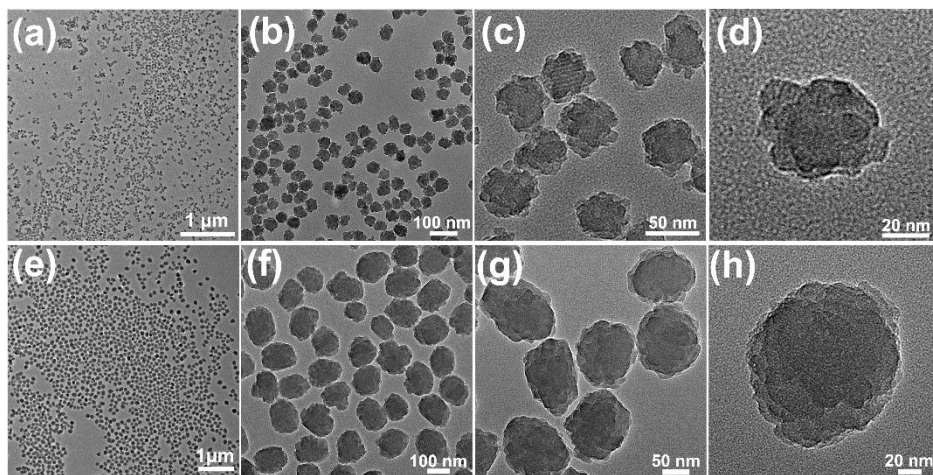

**Figure S4.** TEM and HRTEM images of (a-d) S-LC-8o, (e-h) S-L<sub>6</sub>C<sub>6</sub>-8o.

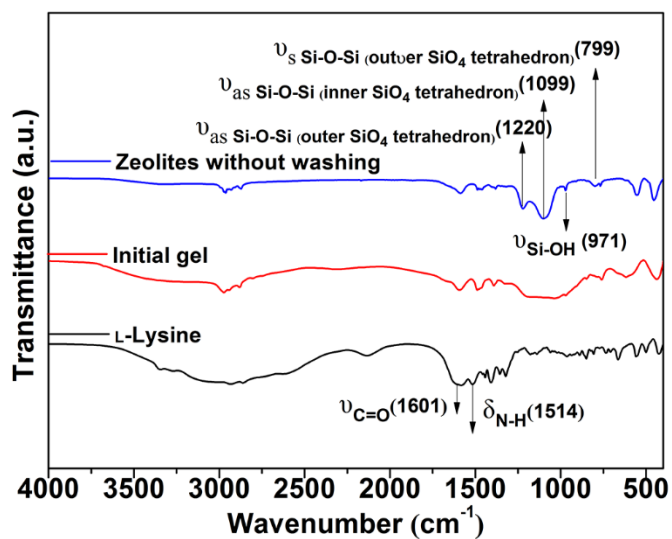

**Figure S5.** FTIR spectra of L-lysine, dried initial synthesis gel, and dried silicalite-1 samples without washing.

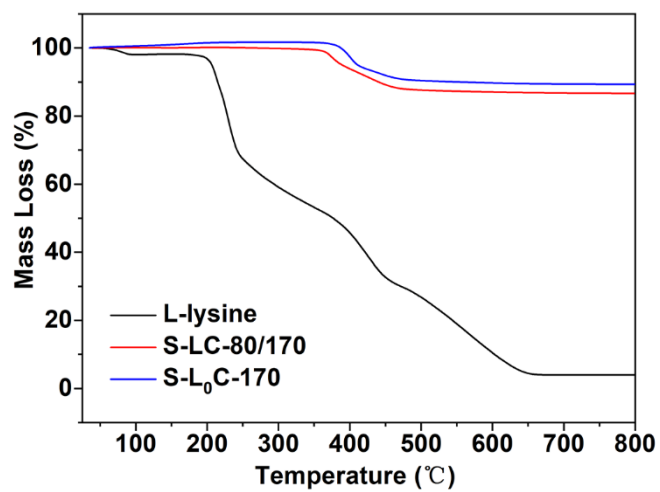

Figure S6. TG curves of silicalite-1 samples and L-lysine.

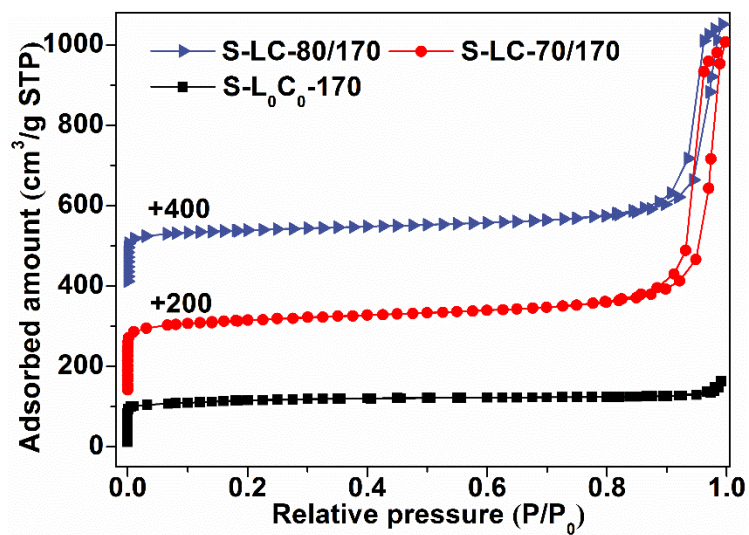

Figure S7. N<sub>2</sub> adsorption/desorption of selected silicalite-1 samples.

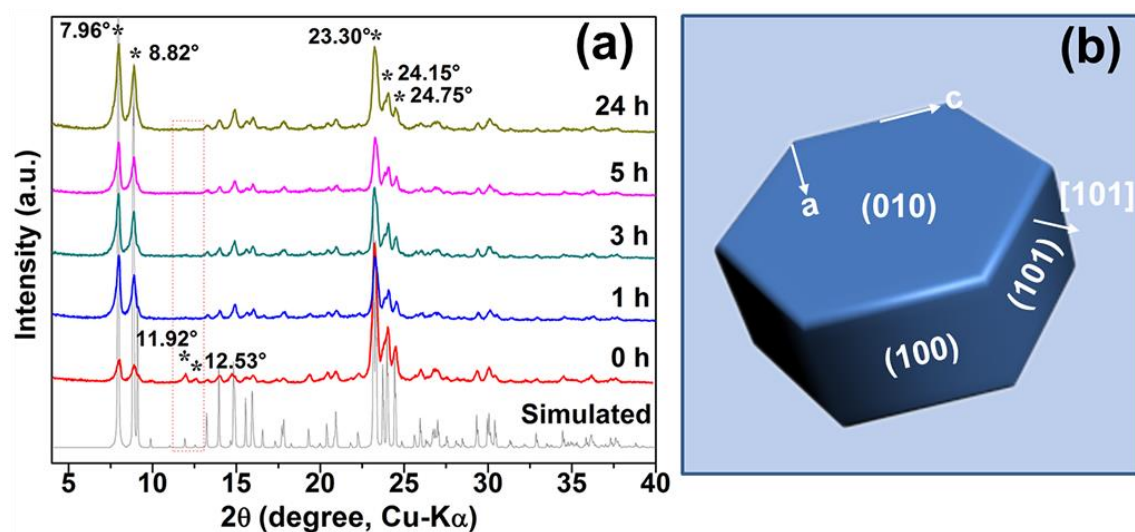

**Figure S8.** (a) XRD patterns of S-LC-8o crystallized at 170°C for different time and (b) a schematic identifying the crystal faces and directions.

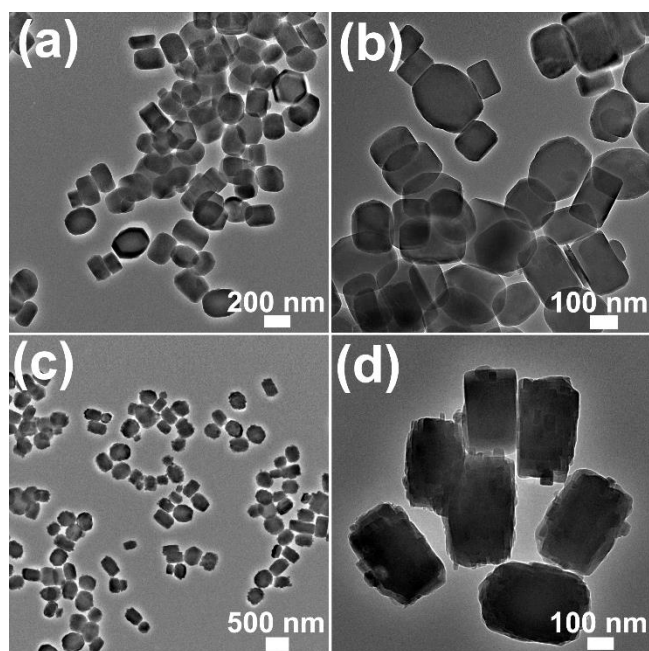

**Figure S9 .** TEM images of (a), (b) CZ-1 and (c), (d) CZ-2.

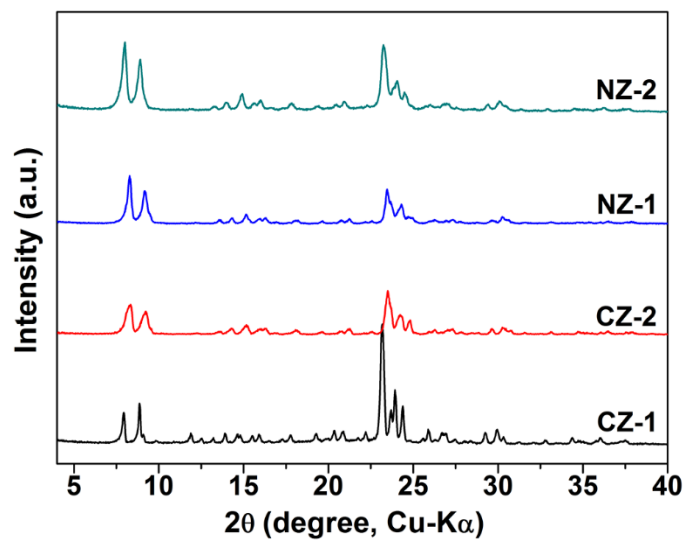

**Figure S10.** XRD patterns of nanosized ZSM-5 catalysts NZ-1 and NZ-2, and conventional ZSM-5 catalysts CZ-1 and CZ-2.

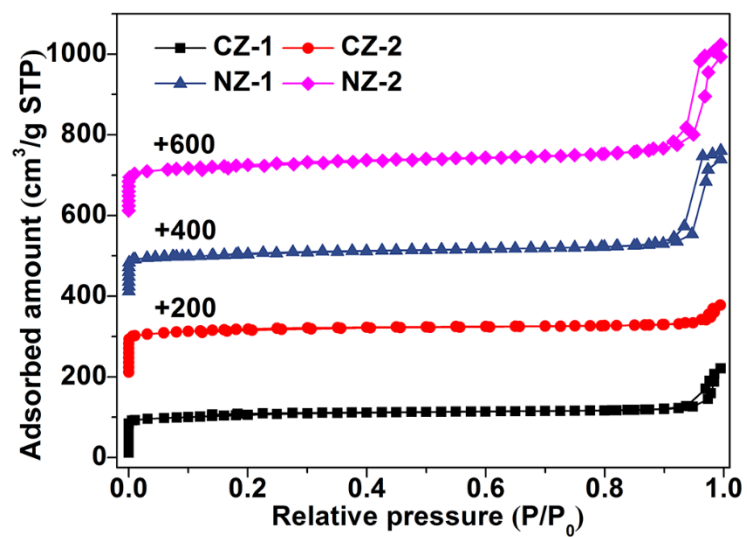

**Figure S11.**  $\text{N}_2$  adsorption/desorption of selected ZSM-5 samples.



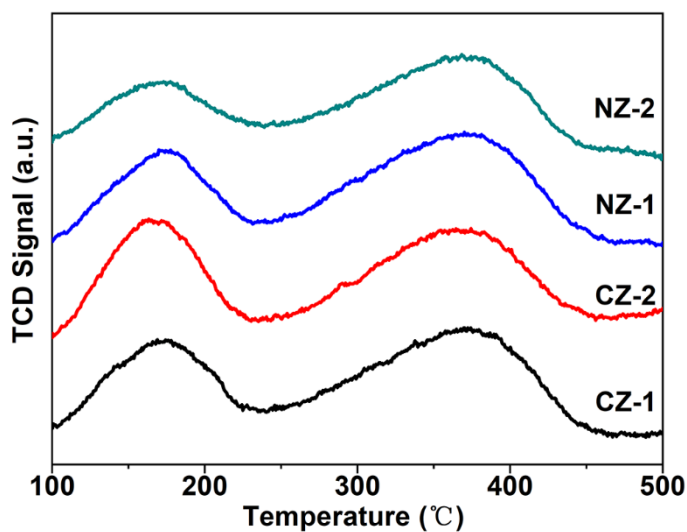

**Figure S12.**  $\text{NH}_3$ -TPD profiles of nanosized ZSM-5 catalysts NZ-1, NZ-2 and conventional ZSM-5 catalysts CZ-1, CZ-2.

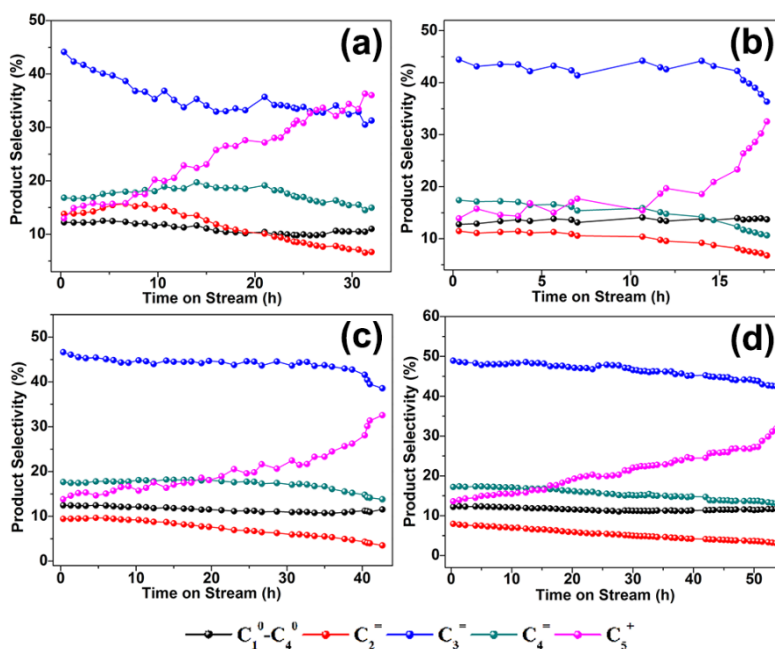

**Figure S13.** Product selectivity of methanol as a function of time on stream over (a) CZ-1, (b) CZ-2, (c) NZ-1, and (d) NZ-2. Reaction conditions:  $T = 470^\circ\text{C}$ ,  $P_{\text{total}} = 1 \text{ atm}$ .  $\text{WHSV} = 7.2 \text{ h}^{-1}$ , catalyst weight = 150 mg.

**Table S1.** Molar compositions of the initial mixtures, reaction conditions, and particle sizes of nanosized and conventional ZSM-5 catalysts.

| Sample | SiO <sub>2</sub> | TPAOH | L-lysine | Al <sub>2</sub> O <sub>3</sub> | Na <sub>2</sub> O | H <sub>2</sub> O/Si | Temperature (time) | Si/Al <sup>a</sup> | Particle size <sup>b</sup> (nm) |
|--------|------------------|-------|----------|--------------------------------|-------------------|---------------------|--------------------|--------------------|---------------------------------|
| NZ-1   | 1                | 0.45  | 0.1      | 0.003                          | 0.015             | 9                   | 80(2d)/170(1d)     | 157                | 58                              |
| NZ-2   | 1                | 0.45  | 0.1      | 0.0025                         | 0.015             | 9                   | 80(2d)/170(1d)     | 193                | 57                              |
| CZ-1   | 1                | 0.45  | 0        | 0.003                          | 0.015             | 35                  | 170(4d)            | 154                | 238                             |
| CZ-2   | 1                | 0.45  | 0        | 0.003                          | 0.015             | 100                 | 170(4d)            | 158                | 442                             |

<sup>a</sup>Measured by using an Inductively Coupled Plasma-Atomic Emission Spectrometry (ICP-AES).

<sup>b</sup>Particle size : estimated based on TEM results by counting more than 100 particles.

**Table S2.** C, H, N analysis of selected samples.

| Sample      | C[wt%] | H[wt%] | N[wt%] | C/H(mol/mol) | C/N(mol/mol) |
|-------------|--------|--------|--------|--------------|--------------|
| S-LC-80/170 | 8.20   | 1.78   | 0.76   | 0.38         | 12.58        |
| S-LoC-170   | 8.39   | 1.84   | 0.78   | 0.38         | 12.55        |
| TPAOH       | /      | /      | /      | 0.41         | 12.00        |
| L-lysine    | /      | /      | /      | 0.42         | 3.00         |

**Table S3.** Crystal sizes estimated by Scherrer equation to selected (hkl) planes of S-LC-8o crystallized at 170°C for different time.

| Crystallization time (h) | Crystal size from Scherrer equation <sup>a</sup> (nm) |       |
|--------------------------|-------------------------------------------------------|-------|
|                          | (101)                                                 | (200) |
| 0                        | 55.8                                                  | 52.0  |
| 1                        | 54.2                                                  | 52.0  |
| 3                        | 56.8                                                  | 54.0  |
| 5                        | 56.2                                                  | 54.0  |
| 24                       | 56.6                                                  | 53.4  |

<sup>a</sup>The Scherrer equation is of the form:  $D = K\lambda / (B \cos \theta)$ ; where D is the crystal sizes to selected (hkl) planes, K is the Scherrer constant,  $\lambda$  is the wavelength of X-rays, B is the full width at half maximum of the peak,  $\theta$  is the diffraction angle.
